# Supplementary material for: Exploring the transcription factor activity in high-throughput gene expression data using RLQ analysis
Source: PubMed Central journal article supplement (PMC3686578; doi:10.1186/1471-2105-14-178), 2013-06-06

Exploring the transcription factor activity in  
high-throughput gene expression data using RLQ  
analysis

Florent Baty, Jochen Rüdiger, Nicola Miglino,  
Lukas Kern, Peter Borger, and Martin Brutsche

Appendix — Figures

Figure 1: **RLQ analysis of the time course effect of mometasone-furoate — fourth-corner statistics.** The significance of the link between experimental variables and transcription factor binding sites was tested by permutation procedures. All 282 TFBSs are represented row-wise in alphabetic order, whereas all time points (in hours) are represented column-wise. The following color coding was used: white for non-significant, light grey for negative significant, and dark grey for positive significant relationship.

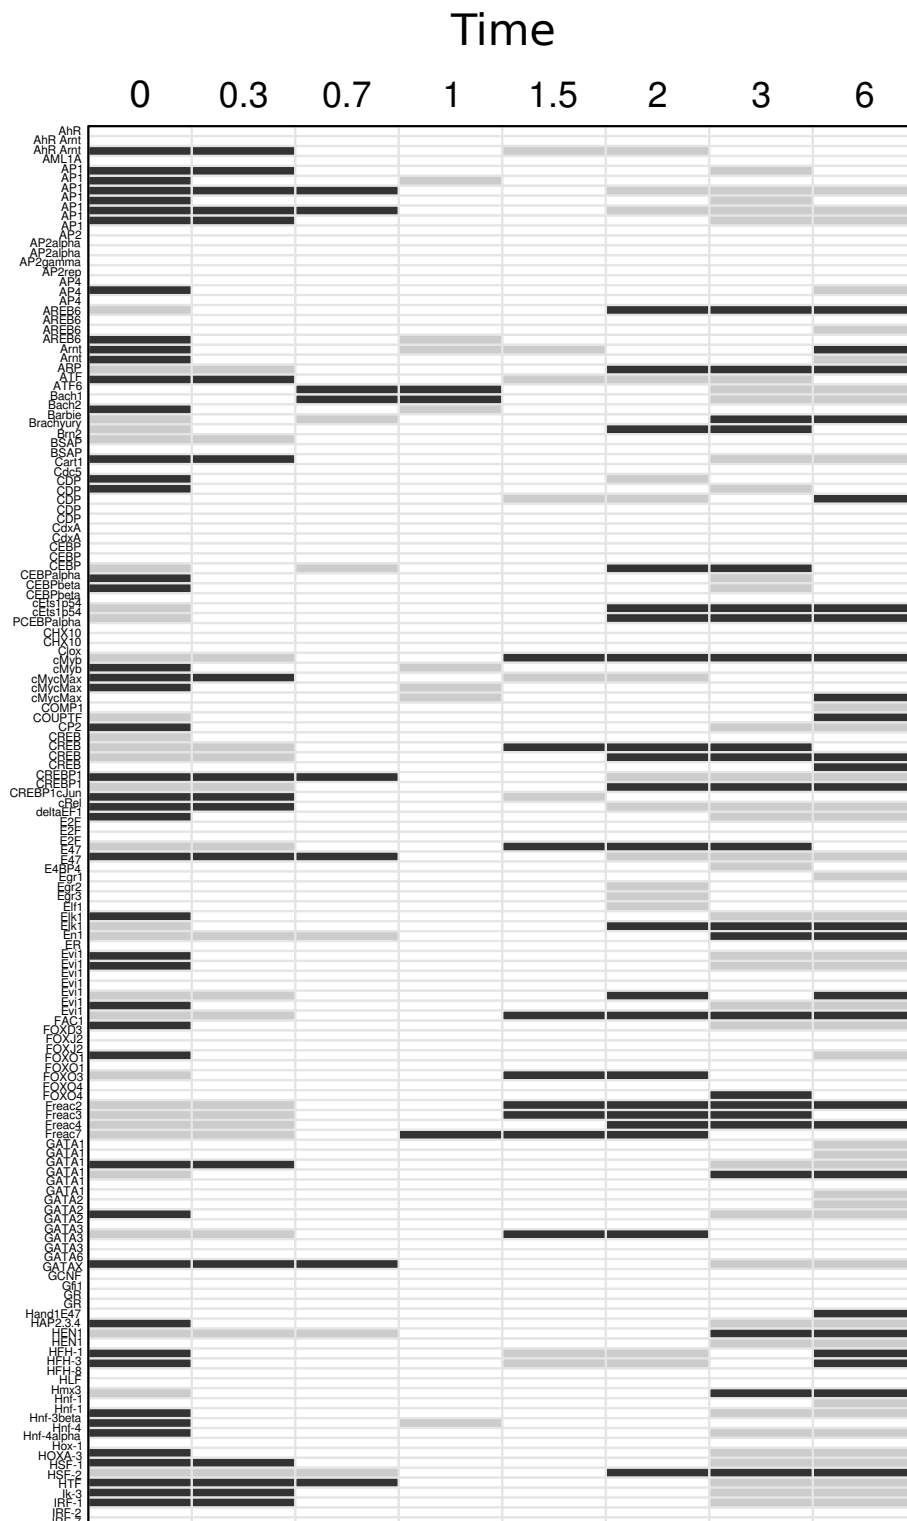



Figure 2: **Western blot analysis of OCT-1 and CREB protein expression levels.** This shows the time course effect of MF on the expression levels of nuclear (left lanes) and cytosolic (right lanes) OCT-1 and CREB in primary lung fibroblasts.

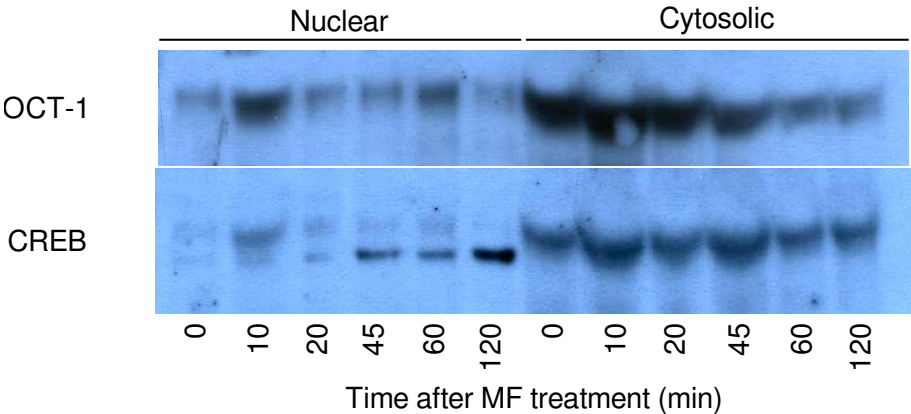

Supplement: 1471-2105-14-178-S1.pdf [file 1471-2105-14-178-S1.pdf]
